# Supplementary material for: Cell adhesion on glassy scaffolds with a different mechanical response
Source: Royal Society of Chemistry journal article supplement (doi:10.1039/c6tb02617f), 2016-12-12
Supplement: c6tb02617f1.pdf [file c6tb02617f1.pdf]

Electronic supplementary information (ESI)

## Cell adhesion on glassy scaffolds with different mechanical response

Shinichiro Shimomura,<sup>a</sup> Hisao Matsuno,<sup>\*,a,b</sup> Kazuaki Sanada,<sup>c</sup> and Keiji Tanaka<sup>\*,a,b</sup>

<sup>a</sup> Department of Applied Chemistry, Kyushu University, Fukuoka 819-0395, Japan

<sup>b</sup> International Institute for Carbon-Neutral Energy Research (WPI-I2CNER), Kyushu University, Fukuoka 819-0395, Japan

<sup>c</sup> Department of Mechanical Systems Engineering, Toyama Prefectural University, Imizu 939-0398, Japan

\*To whom correspondence should be addressed

FAX: +81-92-802-2880      TEL: +81-92-802-2878

E-mail: h-matsuno@cstf.kyushu-u.ac.jp and k-tanaka@cstf.kyushu-u.ac.jp

### Static water contact angles.

Static water contact angles were examined for poly(methyl methacrylate)/polyisoprene (PMMA/PI) bilayer films and PMMA monolayer films, respectively, with a different thickness of each PMMA layer ( $d_{\text{PMMA}}$ ). Fig. S1 shows the data. The averaged water contact angle values were approximately  $77^\circ$  and these values were almost the same regardless of the configuration and the  $d_{\text{PMMA}}$  of the films.

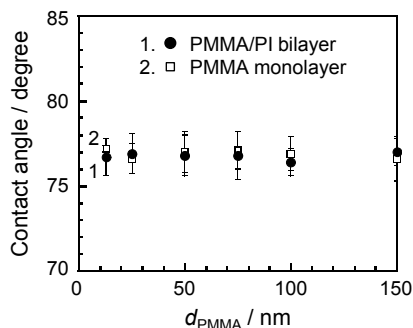

Fig. S1 Water contact angles for the PMMA/PI bilayer and PMMA monolayer films, respectively.
